# Supplementary material
Source: HighWire-hosted journal article supplement (https://www.ajnr.org/highwire/filestream/52756/field_highwire_adjunct_files/0/15-01127.pdf)
Supplement: 15-01127.pdf [file 15-01127.pdf]

**On-line Table: Procedure and device characteristics**

| Variable                                                                        | No. Stroke/No. Total (%) | OR (95% CI)        | P Value |
|---------------------------------------------------------------------------------|--------------------------|--------------------|---------|
| Preprocedural antiplatelet use                                                  |                          |                    |         |
| Yes                                                                             | 4.6% (31/681)            | 1.02 (0.39–2.68)   | .9672   |
| No                                                                              | 4.5% (5/112)             | Ref                |         |
| Preprocedural platelet aggregation studies                                      |                          |                    |         |
| Yes                                                                             | 5.1% (29/564)            | 1.72 (0.74–3.98)   | .2062   |
| No                                                                              | 3.1% (7/229)             | Ref                |         |
| Heparin administration                                                          |                          |                    |         |
| Yes                                                                             | 4.4% (31/704)            | 0.77 (0.29–2.04)   | .6046   |
| No                                                                              | 5.6% (5/89)              | Ref                |         |
| Reversal of heparin                                                             |                          |                    |         |
| Yes                                                                             | 5.6% (1/18)              | 1.24 (0.16–9.61)   | .8343   |
| No                                                                              | 4.4% (30/689)            | Ref                |         |
| Number of PEDs used                                                             |                          |                    |         |
| 1                                                                               | 3.0% (16/533)            | Ref                |         |
| 2                                                                               | 7.1% (13/183)            | 2.48 (1.18–5.21)   | .0162   |
| ≥3                                                                              | 9.2% (7/76)              | 3.38 (1.37–8.35)   | .0081   |
| How multiple PEDs were used                                                     |                          |                    |         |
| Overlapping                                                                     | 7.1% (10/140)            | Ref                |         |
| Multiple layers                                                                 | 5.0% (2/40)              | 0.81 (0.19–3.41)   | .7706   |
| Additional length                                                               | 10.5% (8/76)             | 1.54 (0.59–4.01)   | .3741   |
| Multiple layers and overlapping                                                 | 0.0% (0/2)               | 2.48 (0.06–108.06) | .6365   |
| Sheaths used                                                                    |                          |                    |         |
| Arrow-Flex <sup>a</sup>                                                         |                          |                    |         |
| Yes                                                                             | 7.3% (3/41)              | 1.21 (0.36–4.14)   | .7577   |
| No                                                                              | 6.1% (33/540)            | Ref                |         |
| Shuttle Select <sup>b</sup>                                                     |                          |                    |         |
| Yes                                                                             | 4.0% (10/249)            | 0.49 (0.23–1.04)   | .0637   |
| No                                                                              | 7.8% (26/332)            | Ref                |         |
| Pinnacle Destination <sup>c</sup>                                               |                          |                    |         |
| Yes                                                                             | 17.6% (6/34)             | 3.69 (1.42–9.60)   | .0074   |
| No                                                                              | 5.5% (30/547)            | Ref                |         |
| Microcatheters used                                                             |                          |                    |         |
| Marksman                                                                        |                          |                    |         |
| Yes                                                                             | 5.7% (32/557)            | 0.30 (0.10–0.94)   | .0395   |
| No                                                                              | 16.7% (4/24)             | Ref                |         |
| Echelon <sup>d</sup>                                                            |                          |                    |         |
| Yes                                                                             | 12.1% (4/33)             | 2.22 (0.74–6.71)   | .1559   |
| No                                                                              | 5.8% (32/548)            | Ref                |         |
| Guidewires used                                                                 |                          |                    |         |
| Traxcess EX, <sup>e</sup> Neuroscout, <sup>f</sup> Synchro <sup>g</sup>         |                          |                    |         |
| Yes                                                                             | 5.4% (19/354)            | 0.70 (0.35–1.37)   | .2962   |
| No                                                                              | 7.5% (17/226)            | Ref                |         |
| Headliner 16, <sup>c</sup> GT Wire 16, <sup>c</sup> Silverspeed 16 <sup>d</sup> |                          |                    |         |
| Yes                                                                             | 10.7% (6/56)             | 1.98 (0.78–4.98)   | .1483   |
| No                                                                              | 5.7% (30/524)            | Ref                |         |
| Transend 18 <sup>h</sup>                                                        |                          |                    |         |
| Yes                                                                             | 5.5% (3/55)              | 0.86 (0.25–2.90)   | .8082   |
| No                                                                              | 6.3% (33/525)            | Ref                |         |
| Exchange wires                                                                  |                          |                    |         |
| Yes                                                                             | 5.5% (8/146)             | 0.84 (0.37–1.89)   | .6740   |
| No                                                                              | 6.5% (28/434)            | Ref                |         |
| Balloons used                                                                   |                          |                    |         |
| Hyper balloons <sup>d</sup>                                                     |                          |                    |         |
| Yes                                                                             | 6.8% (3/44)              | 1.77 (0.49–6.31)   | .3821   |
| No                                                                              | 4.0% (16/402)            | Ref                |         |
| PTA balloons, <sup>h</sup> Quantum <sup>g</sup>                                 |                          |                    |         |
| Yes                                                                             | 20.0% (1/5)              | 5.88 (0.62–55.27)  | .1215   |
| No                                                                              | 4.1% (18/441)            | Ref                |         |
| Closure device                                                                  |                          |                    |         |
| Yes                                                                             | 5.3% (24/451)            | 0.55 (0.27–1.14)   | .1076   |
| No                                                                              | 6.2% (36/581)            | Ref                |         |

<sup>a</sup> Teleflex Medical, Royersford, Pennsylvania.

<sup>b</sup> Cook Medical, Bloomington, Indiana.

<sup>c</sup> Terumo, Tokyo, Japan.

<sup>d</sup> Covidien.

<sup>e</sup> MicroVention, Tustin, California.

<sup>f</sup> Codman & Shurtleff, Raynham, Massachusetts.

<sup>g</sup> Boston Scientific, Natick, Massachusetts.

<sup>h</sup> Stryker, Kalamazoo, Michigan.
